# Supplementary material for: Testing and Management of Iron Overload After Genetic Screening–Identified Hemochromatosis
Source: PubMed Central journal article supplement (PMC10594145; doi:10.1001/jamanetworkopen.2023.38995), 2023-10-23
Supplement: jamanetwopen-e2338995-s003.pdf [file jamanetwopen-e2338995-s003.pdf]

## **Data Sharing Statement**

### **Data**

**Data available:** No

### **Additional Information**

**Explanation for why data not available:** Some or all datasets generated during and/or analyzed during the current study are not publicly available but are available from the corresponding author upon reasonable request.
